# Supplementary material for: The Functions and Mechanism of a New Oligopeptide BP9 from Avian Bursa on Antibody Responses, Immature B Cell, and Autophagy
Source: J Immunol Res. 2019 Jan 6;2019:1574383. doi: 10.1155/2019/1574383 (PMC6339771; doi:10.1155/2019/1574383)
Supplement: Supplementary 5 — Table S2: the regulated genes involved in immune-related GO terms in BP9-treated WEHI-231 cells. [file 1574383.f5.xls]

## Sheet: Table S2
Table S2. The regulated genes involved in immune related GO terms in BP9-treated WEHI231 cells
#Term	Regulated gene number	Regulated gene symbol
alpha-beta T cell activation involved in immune response	7	mmu:16842,Lef1,16842:down|mmu:17863,Myb,17863:up|mmu:14462,Gata3,14462:up|mmu:16362,Irf1,16362:up|mmu:20852,Stat6,20852:down|mmu:15284,Hlx,15284:up|mmu:15978,Ifng,15978:up
alpha-beta T cell differentiation involved in immune response	7	mmu:16842,Lef1,16842:down|mmu:17863,Myb,17863:up|mmu:14462,Gata3,14462:up|mmu:16362,Irf1,16362:up|mmu:20852,Stat6,20852:down|mmu:15284,Hlx,15284:up|mmu:15978,Ifng,15978:up
T cell differentiation involved in immune response	7	mmu:16842,Lef1,16842:down|mmu:17863,Myb,17863:up|mmu:14462,Gata3,14462:up|mmu:16362,Irf1,16362:up|mmu:20852,Stat6,20852:down|mmu:15284,Hlx,15284:up|mmu:15978,Ifng,15978:up
CD4-positive, alpha-beta T cell differentiation involved in immune response	6	mmu:16842,Lef1,16842:down|mmu:16362,Irf1,16362:up|mmu:17863,Myb,17863:up|mmu:14462,Gata3,14462:up|mmu:20852,Stat6,20852:down|mmu:15284,Hlx,15284:up
T cell activation involved in immune response	8	mmu:16842,Lef1,16842:down|mmu:17863,Myb,17863:up|mmu:14462,Gata3,14462:up|mmu:16362,Irf1,16362:up|mmu:15962,Ifna1,15962:down|mmu:20852,Stat6,20852:down|mmu:15284,Hlx,15284:up|mmu:15978,Ifng,15978:up
positive regulation of T cell migration	4	mmu:66824,Pycard,66824:down|mmu:55985,Cxcl13,55985:up|mmu:20315,Cxcl12,20315:up|mmu:16401,Itga4,16401:up
lymphocyte migration	8	mmu:20312,Cx3cl1,20312:up|mmu:20315,Cxcl12,20315:up|mmu:14462,Gata3,14462:up|mmu:66824,Pycard,66824:down|mmu:12766,Cxcr3,12766:up|mmu:75458,Cklf,75458:down|mmu:55985,Cxcl13,55985:up|mmu:16401,Itga4,16401:up
T-helper cell differentiation	6	mmu:16842,Lef1,16842:down|mmu:16362,Irf1,16362:up|mmu:17863,Myb,17863:up|mmu:14462,Gata3,14462:up|mmu:20852,Stat6,20852:down|mmu:15284,Hlx,15284:up
T-helper 1 cell differentiation	4	mmu:15284,Hlx,15284:up|mmu:16842,Lef1,16842:down|mmu:20852,Stat6,20852:down|mmu:16362,Irf1,16362:up
negative regulation of type 2 immune response	3	mmu:15284,Hlx,15284:up|mmu:20852,Stat6,20852:down|mmu:16362,Irf1,16362:up
negative regulation of T-helper 2 cell differentiation	2	mmu:15284,Hlx,15284:up|mmu:16362,Irf1,16362:up
positive regulation of T-helper cell differentiation	3	mmu:17863,Myb,17863:up|mmu:15284,Hlx,15284:up|mmu:16362,Irf1,16362:up
positive regulation of T-helper 1 cell differentiation	2	mmu:15284,Hlx,15284:up|mmu:16362,Irf1,16362:up
antigen processing and presentation of endogenous peptide antigen via MHC class I	2	mmu:21355,Tap2,21355:up|mmu:21356,Tapbp,21356:down
regulation of MHC class II biosynthetic process	3	mmu:74164,Nfx1,74164:down|mmu:16153,Il10,16153:down|mmu:15978,Ifng,15978:up
MHC class II biosynthetic process	3	mmu:74164,Nfx1,74164:down|mmu:16153,Il10,16153:down|mmu:15978,Ifng,15978:up
cytokinetic process	4	mmu:26934,Racgap1,26934:down|mmu:235406,Snx33,235406:down|mmu:234857,Spire2,234857:up|mmu:216846,Cntrob,216846:down
negative regulation of cytokine secretion	7	mmu:20312,Cx3cl1,20312:up|mmu:16153,Il10,16153:down|mmu:319430,C5ar2,319430:up|mmu:22163,Tnfrsf4,22163:up|mmu:216799,Nlrp3,216799:up|mmu:81799,C1qtnf3,81799:up|mmu:11600,Angpt1,11600:up
cytoskeleton-dependent cytokinesis	6	mmu:68767,Wash,68767:up|mmu:235406,Snx33,235406:down|mmu:12631,Cfl1,12631:up|mmu:26934,Racgap1,26934:down|mmu:234857,Spire2,234857:up|mmu:216846,Cntrob,216846:down
regulation of cytokine secretion	13	mmu:20312,Cx3cl1,20312:up|mmu:16153,Il10,16153:down|mmu:14462,Gata3,14462:up|mmu:54698,Crtam,54698:down|mmu:56620,Clec4n,56620:up|mmu:66824,Pycard,66824:down|mmu:12774,Ccr5,12774:down|mmu:11600,Angpt1,11600:up|mmu:319430,C5ar2,319430:up|mmu:22163,Tnfrsf4,22163:up|mmu:216799,Nlrp3,216799:up|mmu:81799,C1qtnf3,81799:up|mmu:15978,Ifng,15978:up
cytokine secretion	14	mmu:20312,Cx3cl1,20312:up|mmu:16153,Il10,16153:down|mmu:14462,Gata3,14462:up|mmu:54698,Crtam,54698:down|mmu:56620,Clec4n,56620:up|mmu:66824,Pycard,66824:down|mmu:12774,Ccr5,12774:down|mmu:11600,Angpt1,11600:up|mmu:16822,Lcp2,16822:up|mmu:319430,C5ar2,319430:up|mmu:22163,Tnfrsf4,22163:up|mmu:216799,Nlrp3,216799:up|mmu:81799,C1qtnf3,81799:up|mmu:15978,Ifng,15978:up
negative regulation of cytokine secretion involved in immune response	2	mmu:16153,Il10,16153:down|mmu:11600,Angpt1,11600:up
positive regulation of cytokine secretion	9	mmu:16153,Il10,16153:down|mmu:14462,Gata3,14462:up|mmu:54698,Crtam,54698:down|mmu:56620,Clec4n,56620:up|mmu:66824,Pycard,66824:down|mmu:12774,Ccr5,12774:down|mmu:216799,Nlrp3,216799:up|mmu:81799,C1qtnf3,81799:up|mmu:15978,Ifng,15978:up
negative regulation of cytokine production	16	mmu:20312,Cx3cl1,20312:up|mmu:217410,Trib2,217410:down|mmu:16842,Lef1,16842:down|mmu:80861,Dhx58,80861:down|mmu:109689,Arrb1,109689:up|mmu:14462,Gata3,14462:up|mmu:66824,Pycard,66824:down|mmu:19043,Ppm1b,19043:up|mmu:23938,Map2k5,23938:up|mmu:11600,Angpt1,11600:up|mmu:319430,C5ar2,319430:up|mmu:22163,Tnfrsf4,22163:up|mmu:216799,Nlrp3,216799:up|mmu:16153,Il10,16153:down|mmu:81799,C1qtnf3,81799:up|…
positive regulation of interleukin-1 secretion	4	mmu:12774,Ccr5,12774:down|mmu:66824,Pycard,66824:down|mmu:216799,Nlrp3,216799:up|mmu:15978,Ifng,15978:up
positive regulation of interleukin-1 beta secretion	4	mmu:12774,Ccr5,12774:down|mmu:66824,Pycard,66824:down|mmu:216799,Nlrp3,216799:up|mmu:15978,Ifng,15978:up
positive regulation of interleukin-1 production	5	mmu:12774,Ccr5,12774:down|mmu:433759,Hdac1,433759:up|mmu:66824,Pycard,66824:down|mmu:216799,Nlrp3,216799:up|mmu:15978,Ifng,15978:up
regulation of interleukin-1 beta secretion	4	mmu:12774,Ccr5,12774:down|mmu:66824,Pycard,66824:down|mmu:216799,Nlrp3,216799:up|mmu:15978,Ifng,15978:up
regulation of interleukin-1 secretion	4	mmu:12774,Ccr5,12774:down|mmu:66824,Pycard,66824:down|mmu:216799,Nlrp3,216799:up|mmu:15978,Ifng,15978:up
positive regulation of interleukin-1 beta production	4	mmu:12774,Ccr5,12774:down|mmu:66824,Pycard,66824:down|mmu:216799,Nlrp3,216799:up|mmu:15978,Ifng,15978:up
interleukin-1 beta secretion	4	mmu:12774,Ccr5,12774:down|mmu:66824,Pycard,66824:down|mmu:216799,Nlrp3,216799:up|mmu:15978,Ifng,15978:up
interleukin-1 secretion	4	mmu:12774,Ccr5,12774:down|mmu:66824,Pycard,66824:down|mmu:216799,Nlrp3,216799:up|mmu:15978,Ifng,15978:up
negative regulation of interleukin-6 secretion	2	mmu:81799,C1qtnf3,81799:up|mmu:319430,C5ar2,319430:up
interleukin-6 secretion	3	mmu:66824,Pycard,66824:down|mmu:319430,C5ar2,319430:up|mmu:81799,C1qtnf3,81799:up
negative regulation of type I interferon production	3	mmu:66824,Pycard,66824:down|mmu:19043,Ppm1b,19043:up|mmu:80861,Dhx58,80861:down
negative regulation of interferon-beta production	2	mmu:66824,Pycard,66824:down|mmu:19043,Ppm1b,19043:up
autophagy	22	mmu:54170,Rragc,54170:down|mmu:17762,Mapt,17762:up|mmu:20869,Stk11,20869:up|mmu:29869,Ulk2,29869:down|mmu:72607,Usp13,72607:down|mmu:66824,Pycard,66824:down|mmu:66597,Trim13,66597:up|mmu:66840,Wdr45b,66840:down|mmu:68767,Wash,68767:up|mmu:12752,Cln3,12752:up|mmu:100504663,Atg14,100504663:up|mmu:72018,Fundc1,72018:up|mmu:242557,Atg4c,242557:down|mmu:100502698,1700021K19Rik,100502698:down|mmu:67526…
regulation of autophagy	13	mmu:54170,Rragc,54170:down|mmu:17762,Mapt,17762:up|mmu:15251,Hif1a,15251:down|mmu:68767,Wash,68767:up|mmu:29869,Ulk2,29869:down|mmu:72607,Usp13,72607:down|mmu:66824,Pycard,66824:down|mmu:12752,Cln3,12752:up|mmu:19337,Rab33a,19337:up|mmu:12539,Cdc37,12539:up|mmu:100504663,Atg14,100504663:up|mmu:66597,Trim13,66597:up|mmu:100502698,1700021K19Rik,100502698:down
macroautophagy	10	mmu:70381,Tecpr1,70381:down|mmu:29869,Ulk2,29869:down|mmu:12752,Cln3,12752:up|mmu:19337,Rab33a,19337:up|mmu:100504663,Atg14,100504663:up|mmu:66597,Trim13,66597:up|mmu:67526,Atg12,67526:up|mmu:73683,Atg16l2,73683:down|mmu:242557,Atg4c,242557:down|mmu:66840,Wdr45b,66840:down
